# Supplementary material for: Adult Moyamoya Disease: A Burden of Intracranial Stenosis in East Asians?
Source: PubMed Central journal article supplement (PMC4488323; doi:10.1371/journal.pone.0130663), 2015-06-30

## **SUPPLEMENTARY MATERIAL**

**Supplementary figure.** Neuroimaging and genetic findings of a patient with non-Moyamoya-type intracranial arterial occlusive disease.

(a) Conventional angiography of a 53-year-old male shows stenosis of the proximal MCA, but intact distal ICA and absence of Moyamoya vessels. (b) Family tree. This patient has a family history of MMD and *RNF213* p.Arg4810Lys mutations. Small black points indicate members who were directly examined. (c) High-resolution MRI reveals a smaller outer diameter (2.32 mm) and the absence of focal plaque in the stenotic segment (arrow). ICH, intracranial hemorrhage.

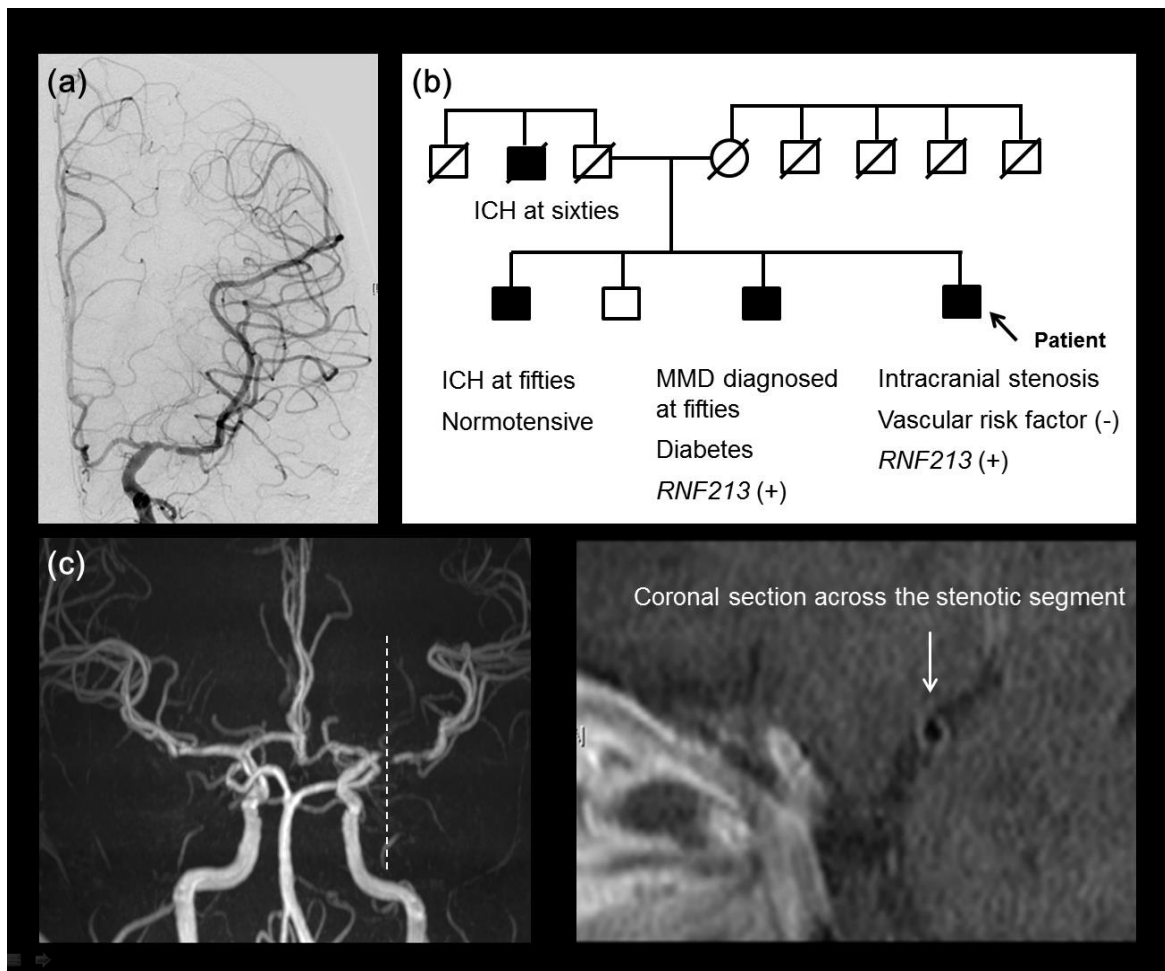

Supplement: pone.0130663.s001.pdf [file pone.0130663.s001.pdf]
